# Supplementary material for: Persistent Symptoms among Frontline Health Workers Post-Acute COVID-19 Infection
Source: MDPI journal article supplement (doi:10.3390/ijerph19105933), 2022-05-13
Supplement: s1 [file s1]

Supplementary Table S1: Characteristics of RTC frontline health workers who tested for COVID-19

| Variables                      | N          | COVID-19 Test Outcome |             | <i>p</i> -Value |
|--------------------------------|------------|-----------------------|-------------|-----------------|
|                                |            | Positive n (%)        | Other n (%) |                 |
| <b>Staff Cadres</b>            |            |                       |             | <b>&lt;0.01</b> |
| Community/Field health Workers | 329        | 95 (38.3)             | 234 (35.0)  |                 |
| Medical/Clinical personnel     | 137        | 42 (16.9)             | 95 (14.2)   |                 |
| Data capturers/Clerks          | 140        | 32 (13.0)             | 108 (16.2)  |                 |
| Programme Coordinators         | 25         | 5 (2.0)               | 20 (3.0)    |                 |
| Programme Support Staff        | 82         | 35 (14.1)             | 47 (7.0)    |                 |
| Missing                        | 203        | 39 (15.7)             | 164 (24.6)  |                 |
| <b>Reasons for testing</b>     |            |                       |             | <b>0.01</b>     |
| COVID-19 contact               | 271        | 73 (29.4)             | 198 (29.6)  |                 |
| COVID-19 PUI/Suspect           | 503        | 151 (60.9)            | 352 (52.7)  |                 |
| Routine Health Surveillance    | 125        | 24 (9.7)              | 101 (15.1)  |                 |
| Travel requirements            | 4          | 0 (0.0)               | 4 (0.6)     |                 |
| Missing                        | 13         | 0 (0.0)               | 13 (2.0)    |                 |
| <b>Province</b>                |            |                       |             | <b>&lt;0.01</b> |
| Gauteng                        | 62         | 16 (6.5)              | 46 (6.9)    |                 |
| Free State                     | 326        | 81 (33.0)             | 245 (36.7)  |                 |
| Mpumalanga                     | 249        | 61 (25.0)             | 188 (28.1)  |                 |
| Eastern Cape                   | 24         | 15 (6.1)              | 9 (1.4)     |                 |
| Northern Cape                  | 2          | 2 (1.0)               | 0 (0.0)     |                 |
| Western Cape                   | 248        | 70 (28.2)             | 178 (26.7)  |                 |
| North West                     | 5          | 3 (1.2)               | 2 (0.3)     |                 |
| <b>Districts</b>               |            |                       |             | <b>&lt;0.01</b> |
| City of Johannesburg MM        | 33         | 8 (3.2)               | 25 (4.0)    |                 |
| City of Tshwane MM             | 23         | 7 (2.8)               | 16 (2.4)    |                 |
| Lejweleputswa                  | 21         | 6 (2.4)               | 15 (2.3)    |                 |
| Ehlanzeni                      | 240        | 58 (23.4)             | 182 (27.3)  |                 |
| Gert Sibande                   | 11         | 2 (0.8)               | 9 (1.4)     |                 |
| Nelson Mandela Bay MM          | 5          | 3 (1.2)               | 2 (0.3)     |                 |
| Amatole                        | 11         | 7 (3.0)               | 4 (1.0)     |                 |
| OR Tambo                       | 5          | 5 (2.0)               | 0 (0.0)     |                 |
| Thabo Mofutsanyane             | 302        | 73 (29.4)             | 229 (34.3)  |                 |
| Dr Kenneth Kaunda              | 7          | 6 (2.4)               | 1 (0.2)     |                 |
| Central Karoo                  | 104        | 15 (6.1)              | 39 (6.0)    |                 |
| Cape Winelands                 | 54         | 15 (6.1)              | 39 (6.0)    |                 |
| Overberg                       | 86         | 25 (10.0)             | 61 (9.1)    |                 |
| City of Cape Town MM           | 2          | 0 (0.0)               | 2 (0.3)     |                 |
| Ngaka Modiri Molema            | 1          | 1 (0.4)               | 0 (0.0)     |                 |
| Nkangala                       | 2          | 1 (0.4)               | 1 (0.2)     |                 |
| Missing                        | 9          | 1 (0.4)               | 8 (1.2)     |                 |
| <b>Total</b>                   | <b>916</b> | <b>248</b>            | <b>668</b>  |                 |

%, percentage; N n, number; *p* value obtained using Pearson Chi and Fisher's exact test

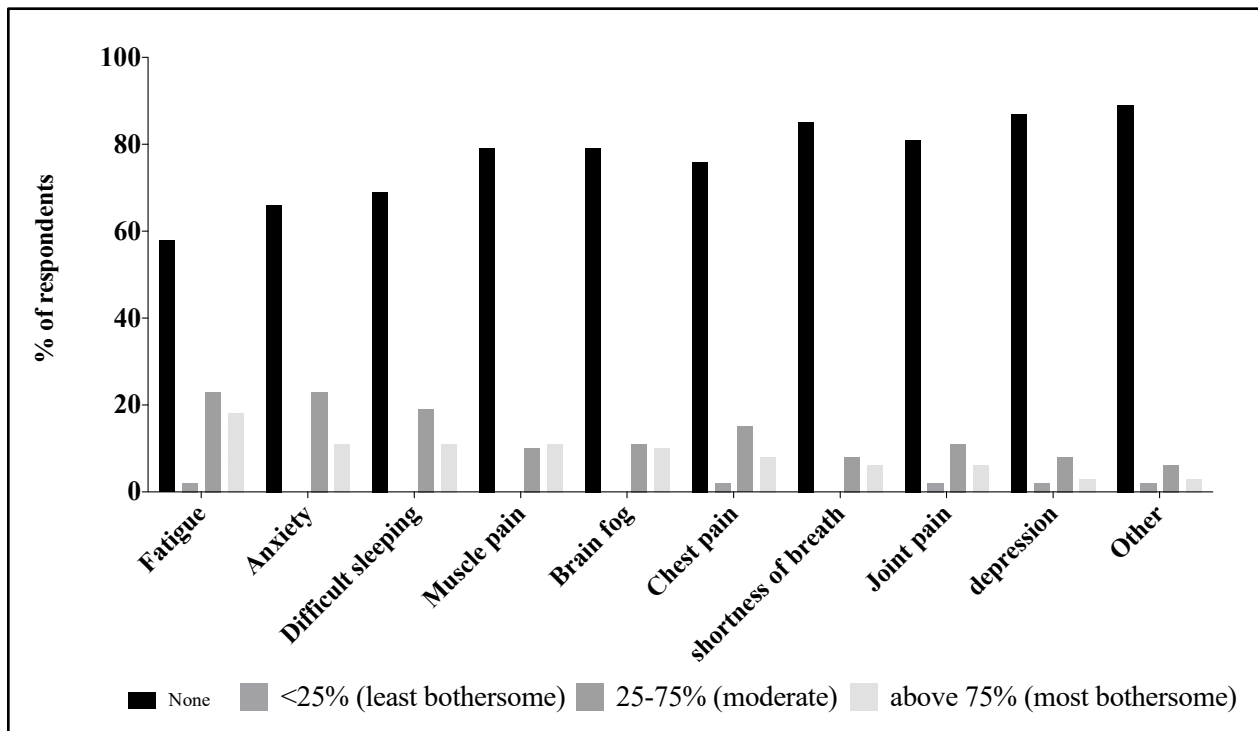

Supplementary Figure S1: Reported bothersome/troubling post-acute COVID-19 symptoms among respondents

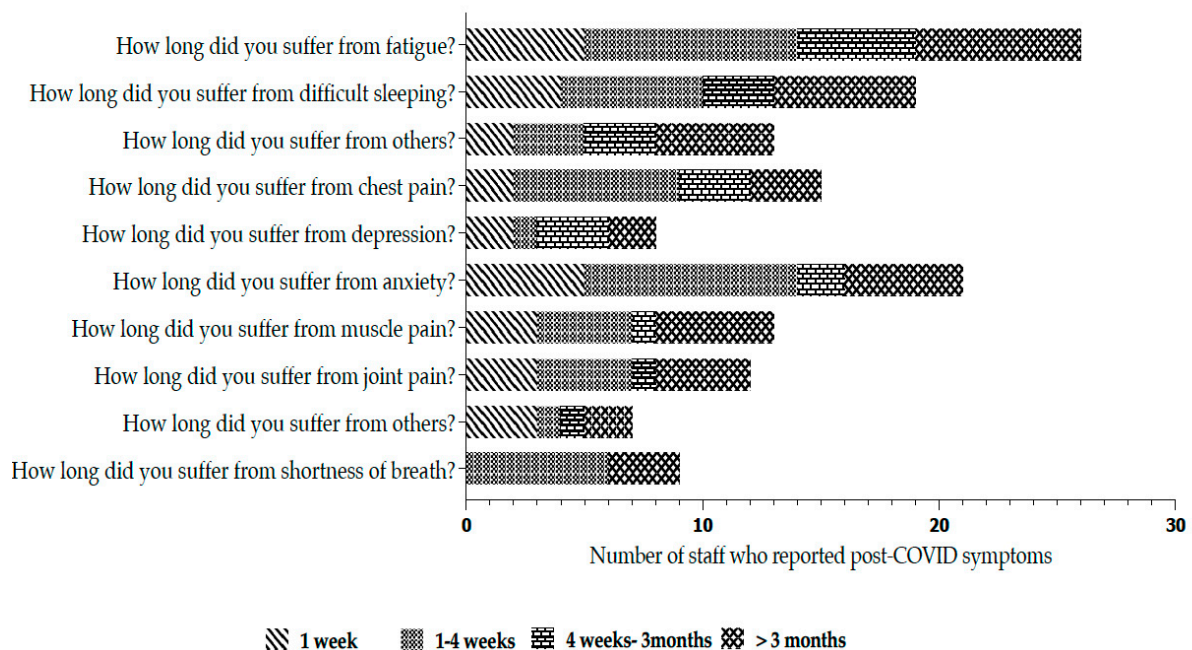

Supplementary Figure S2: Duration of post-acute COVID-19 symptoms among survey respondents. Stacked bar graphs represent duration of the different symptoms reported.

Supplementary Table S2 Factors associated with fatigue for workers who experienced long COVID.

| Variables                    | N         | Fatigue             |                      | <i>p</i> -Value |
|------------------------------|-----------|---------------------|----------------------|-----------------|
|                              |           | No<br>n (%), 9 (60) | Yes<br>n (%), 6 (40) |                 |
| <b>Age Groups</b>            |           |                     |                      | <b>0.94</b>     |
| 23–33                        | 3 (20.0)  | 2 (22.2)            | 1 (16.7)             |                 |
| 34–44                        | 6 (40.0)  | 3 (33.3)            | 3 (16.7)             |                 |
| 45–55                        | 3 (20.0)  | 2 (22.2)            | 1 (16.7)             |                 |
| ≥56                          | 3 (20.0)  | 2 (22.2)            | 1 (16.7)             |                 |
| <b>Sex</b>                   |           |                     |                      | <b>0.29</b>     |
| Female                       | 12 (80.0) | 8 (88.9)            | 4 (66.7)             |                 |
| Male                         | 3 (20.0)  | 1 (11.1)            | 2(33.3)              |                 |
| <b>Ethnicity</b>             |           |                     |                      | <b>0.29</b>     |
| African                      | 12 (80.0) | 6 (66.7)            | 6(100.0)             |                 |
| Caucasian                    | 1 (6.7)   | 1 (11.1)            | 0 (0)                |                 |
| Coloured*                    | 2 (13.3)  | 2 (22.2)            | 0(0)                 |                 |
| <b>Smoking Status</b>        |           |                     |                      | <b>0.79</b>     |
| Current smoker               | 0 (0.0)   | 0 (0.0)             | 0 (0.0)              |                 |
| Never smoker                 | 12 (80.0) | 7 (77.8)            | 12 (80.0)            |                 |
| Past smoker                  | 3(20.0)   | 2 (22.2)            | 3 (20.0)             |                 |
| <b>Alcohol Intake</b>        |           |                     |                      | <b>0.46</b>     |
| Daily                        | 2 (13.3)  | 2 (22.2)            | 0 (0)                |                 |
| Occasional                   | 4 (26.7)  | 2 (22.2)            | 2 (33.3)             |                 |
| Not at all                   | 9 (60)    | 5 (55.6)            | 4 (66.7)             |                 |
| <b>Recreational Drug Use</b> |           |                     |                      | <b>0.46</b>     |
| Daily                        | 1 (6.7)   | 1(11.1)             | 0 (0)                |                 |
| Occasional                   | 13 (86.7) | 7 (77.8)            | 6 (100)              |                 |
| Not at all                   | 1 (6.7)   | 1 (11.1)            | 0 (0)                |                 |

\*an official terminology in South Africa used to describe a multifaceted lived experience (Nilson, 2016) . IQR, interquartile range; N n, number; *p* value obtained using Fisher's exact test
